# Supplementary material
Source: MDPI journal article supplement (https://www.mdpi.com/2075-163X/11/12/1414)
Supplement: s1 [file s1]

**Table S1** LA-ICP-MS zircon U-Pb dating results for the intrusive rocks (DBT01, DBT02, XLT01 and SQT01) in Ulanhot area.

| Analysis |      | Isotopic ratios |                                     |         |                                     |         |                                     | Apparent ages (Ma) |                                     |       |                                     |
|----------|------|-----------------|-------------------------------------|---------|-------------------------------------|---------|-------------------------------------|--------------------|-------------------------------------|-------|-------------------------------------|
|          |      | Th/U            | <sup>206</sup> Pb/ <sup>238</sup> U | 1σ      | <sup>207</sup> Pb/ <sup>235</sup> U | 1σ      | <sup>207</sup> Pb/ <sup>206</sup> U | 1σ                 | <sup>206</sup> Pb/ <sup>238</sup> U | 1σ    | <sup>207</sup> Pb/ <sup>235</sup> U |
| DBT01    |      |                 |                                     |         |                                     |         |                                     |                    |                                     |       |                                     |
| DBT01-1  | 0.45 | 0.01949         | 0.00025                             | 0.13181 | 0.00336                             | 0.04285 | 0.00099                             | 124.5              | 1.61                                | 125.7 | 3.02                                |
| DBT01-2  | 0.62 | 0.01981         | 0.00026                             | 0.13392 | 0.00348                             | 0.0423  | 0.00099                             | 126.5              | 1.64                                | 127.6 | 3.12                                |
| DBT01-3  | 0.68 | 0.01972         | 0.00025                             | 0.13078 | 0.00222                             | 0.04511 | 0.00065                             | 125.9              | 1.58                                | 124.8 | 2                                   |
| DBT01-4  | 0.62 | 0.02102         | 0.00027                             | 0.14134 | 0.0027                              | 0.04489 | 0.00074                             | 134.1              | 1.69                                | 134.2 | 2.4                                 |
| DBT01-5  | 0.64 | 0.01958         | 0.00025                             | 0.13407 | 0.00255                             | 0.04834 | 0.0008                              | 125                | 1.59                                | 127.8 | 2.29                                |
| DBT01-6  | 0.67 | 0.02009         | 0.00026                             | 0.13537 | 0.00239                             | 0.04634 | 0.0007                              | 128.2              | 1.62                                | 128.9 | 2.14                                |
| DBT01-7  | 0.59 | 0.02081         | 0.00027                             | 0.13931 | 0.00249                             | 0.04598 | 0.0007                              | 132.7              | 1.68                                | 132.4 | 2.22                                |
| DBT01-8  | 0.51 | 0.01829         | 0.00024                             | 0.1234  | 0.00297                             | 0.04963 | 0.00109                             | 116.8              | 1.52                                | 118.1 | 2.69                                |
| DBT01-9  | 0.71 | 0.02124         | 0.00028                             | 0.1425  | 0.00358                             | 0.04692 | 0.00107                             | 135.5              | 1.76                                | 135.3 | 3.18                                |
| DBT01-10 | 0.70 | 0.01944         | 0.00025                             | 0.13135 | 0.00266                             | 0.0504  | 0.0009                              | 124.1              | 1.59                                | 125.3 | 2.38                                |
| DBT01-11 | 0.49 | 0.01964         | 0.00026                             | 0.13194 | 0.003                               | 0.04711 | 0.00097                             | 125.4              | 1.62                                | 125.8 | 2.69                                |
| DBT01-12 | 0.86 | 0.01953         | 0.00025                             | 0.13077 | 0.00237                             | 0.04963 | 0.00079                             | 124.7              | 1.59                                | 124.8 | 2.13                                |
| DBT01-13 | 0.47 | 0.01969         | 0.00026                             | 0.13379 | 0.00272                             | 0.04901 | 0.00088                             | 125.7              | 1.62                                | 127.5 | 2.44                                |
| DBT01-14 | 0.63 | 0.01996         | 0.00026                             | 0.13284 | 0.00314                             | 0.0432  | 0.00093                             | 127.4              | 1.65                                | 126.6 | 2.81                                |
| DBT01-15 | 0.45 | 0.01983         | 0.00026                             | 0.13441 | 0.0025                              | 0.05065 | 0.00083                             | 126.6              | 1.62                                | 128.1 | 2.24                                |
| DBT01-16 | 0.57 | 0.02613         | 0.00036                             | 0.17791 | 0.00563                             | 0.05222 | 0.00152                             | 166.3              | 2.23                                | 166.3 | 4.85                                |
| DBT01-17 | 0.58 | 0.01905         | 0.00025                             | 0.12716 | 0.00273                             | 0.04699 | 0.00091                             | 121.6              | 1.58                                | 121.5 | 2.46                                |
| DBT01-18 | 0.65 | 0.02084         | 0.00027                             | 0.13685 | 0.00258                             | 0.04778 | 0.0008                              | 132.9              | 1.71                                | 130.2 | 2.31                                |
| DBT01-19 | 0.77 | 0.01941         | 0.00026                             | 0.1296  | 0.00424                             | 0.05248 | 0.00162                             | 123.9              | 1.67                                | 123.7 | 3.81                                |
| DBT01-20 | 0.74 | 0.02056         | 0.00027                             | 0.13782 | 0.00263                             | 0.05204 | 0.00088                             | 131.2              | 1.69                                | 131.1 | 2.35                                |
| DBT01-21 | 0.85 | 0.02059         | 0.00027                             | 0.13767 | 0.00245                             | 0.04821 | 0.00075                             | 131.4              | 1.68                                | 131   | 2.19                                |

| Analysis | Isotopic ratios |      |                                     |         |                                     |         |                                     | Apparent ages (Ma) |                                     |      |                                     |       |
|----------|-----------------|------|-------------------------------------|---------|-------------------------------------|---------|-------------------------------------|--------------------|-------------------------------------|------|-------------------------------------|-------|
|          | Spot            | Th/U | <sup>206</sup> Pb/ <sup>238</sup> U | 1σ      | <sup>207</sup> Pb/ <sup>235</sup> U | 1σ      | <sup>207</sup> Pb/ <sup>206</sup> U | 1σ                 | <sup>206</sup> Pb/ <sup>238</sup> U | 1σ   | <sup>207</sup> Pb/ <sup>235</sup> U | 1σ    |
|          | DBT01-22        | 0.60 | 0.02665                             | 0.00035 | 0.20598                             | 0.00482 | 0.05608                             | 0.00115            | 169.5                               | 2.23 | 190.2                               | 4.06  |
|          | DBT01-23        | 0.62 | 0.01928                             | 0.00026 | 0.09017                             | 0.00283 | 0.03561                             | 0.00106            | 123.1                               | 1.62 | 87.7                                | 2.63  |
|          | DBT01-24        | 0.44 | 0.02015                             | 0.00027 | 0.13279                             | 0.00436 | 0.04604                             | 0.00142            | 128.6                               | 1.73 | 126.6                               | 3.91  |
|          | DBT01-25        | 0.79 | 0.01955                             | 0.00026 | 0.13149                             | 0.00283 | 0.04878                             | 0.00095            | 124.8                               | 1.63 | 125.4                               | 2.54  |
| DBT02    |                 |      |                                     |         |                                     |         |                                     |                    |                                     |      |                                     |       |
|          | DBT02-1         | 0.64 | 0.03528                             | 0.00042 | 2.30505                             | 0.03421 | 0.53185                             | 0.00643            | 223.5                               | 2.62 | 1213.8                              | 14.76 |
|          | DBT02-2         | 0.76 | 0.01557                             | 0.00021 | 0.10473                             | 0.006   | 0.04674                             | 0.00262            | 99.6                                | 1.31 | 101.1                               | 2.36  |
|          | DBT02-3         | 0.45 | 0.01981                             | 0.00026 | 0.10666                             | 0.00523 | 0.0444                              | 0.00212            | 126.5                               | 1.62 | 102.9                               | 2.7   |
|          | DBT02-4         | 0.39 | 0.02015                             | 0.00024 | 0.13601                             | 0.00269 | 0.05158                             | 0.00094            | 128.6                               | 1.54 | 129.5                               | 1.72  |
|          | DBT02-5         | 0.87 | 0.04251                             | 0.00052 | 0.32295                             | 0.00656 | 0.05822                             | 0.00103            | 268.4                               | 3.2  | 284.2                               | 3.24  |
|          | DBT02-6         | 0.53 | 0.02014                             | 0.00028 | 0.43006                             | 0.01191 | 0.17692                             | 0.0043             | 128.6                               | 1.76 | 363.2                               | 5.37  |
|          | DBT02-7         | 0.99 | 0.04323                             | 0.00052 | 0.30296                             | 0.00481 | 0.05474                             | 0.00075            | 272.8                               | 3.23 | 268.7                               | 3.14  |
|          | DBT02-8         | 0.57 | 0.0185                              | 0.00024 | 0.1252                              | 0.0038  | 0.05105                             | 0.00147            | 118.2                               | 1.49 | 119.8                               | 2.01  |
|          | DBT02-9         | 0.48 | 0.03981                             | 0.00049 | 0.38624                             | 0.00601 | 0.06973                             | 0.00091            | 251.7                               | 3.01 | 331.6                               | 2.22  |
|          | DBT02-10        | 0.88 | 0.02132                             | 0.00027 | 0.34134                             | 0.00603 | 0.11842                             | 0.00183            | 136                                 | 1.67 | 298.2                               | 2.43  |
|          | DBT02-11        | 0.58 | 0.02006                             | 0.00027 | 0.24128                             | 0.00622 | 0.10169                             | 0.00238            | 128.1                               | 1.68 | 219.5                               | 2.57  |
|          | DBT02-12        | 0.93 | 0.04117                             | 0.00051 | 0.31335                             | 0.00523 | 0.05707                             | 0.0008             | 260.1                               | 3.18 | 276.8                               | 2.91  |
|          | DBT02-13        | 0.60 | 0.02016                             | 0.0003  | 0.23422                             | 0.01044 | 0.09246                             | 0.00385            | 128.7                               | 1.9  | 213.7                               | 4.44  |
|          | DBT02-14        | 0.43 | 0.03856                             | 0.00049 | 2.21456                             | 0.03668 | 0.43931                             | 0.00533            | 243.9                               | 3.07 | 1185.7                              | 19.7  |
|          | DBT02-15        | 0.84 | 0.02015                             | 0.00026 | 0.12524                             | 0.00301 | 0.04838                             | 0.00107            | 128.6                               | 1.64 | 119.8                               | 1.68  |
|          | DBT02-16        | 0.47 | 0.01989                             | 0.00026 | 0.13377                             | 0.00382 | 0.05611                             | 0.00149            | 127                                 | 1.67 | 127.5                               | 1.93  |
|          | DBT02-17        | 0.63 | 0.02017                             | 0.00026 | 0.13369                             | 0.00341 | 0.04749                             | 0.00112            | 128.7                               | 1.66 | 127.4                               | 1.7   |
|          | DBT02-18        | 0.61 | 0.02021                             | 0.00028 | 0.13966                             | 0.00497 | 0.04913                             | 0.00165            | 129                                 | 1.74 | 132.7                               | 1.99  |

| Analysis | Isotopic ratios |       |                                     |         |                                     |         |                                     | Apparent ages (Ma) |                                     |      |                                     |      |
|----------|-----------------|-------|-------------------------------------|---------|-------------------------------------|---------|-------------------------------------|--------------------|-------------------------------------|------|-------------------------------------|------|
|          | Spot            | Th/U  | <sup>206</sup> Pb/ <sup>238</sup> U | 1σ      | <sup>207</sup> Pb/ <sup>235</sup> U | 1σ      | <sup>207</sup> Pb/ <sup>206</sup> U | 1σ                 | <sup>206</sup> Pb/ <sup>238</sup> U | 1σ   | <sup>207</sup> Pb/ <sup>235</sup> U | 1σ   |
|          | DBT02-19        | 0.41  | 0.10514                             | 0.00134 | 1.19624                             | 0.01893 | 0.0767                              | 0.0009             | 644.5                               | 7.83 | 798.8                               | 7.67 |
|          | DBT02-20        | 0.505 | 0.01977                             | 0.00028 | 0.1327                              | 0.00529 | 0.05451                             | 0.00206            | 126.2                               | 1.76 | 126.5                               | 2.79 |
|          | DBT02-21        | 0.67  | 0.04942                             | 0.00065 | 0.3682                              | 0.00592 | 0.05482                             | 0.0007             | 311                                 | 3.96 | 318.3                               | 3.43 |
|          | DBT02-22        | 0.61  | 0.02018                             | 0.00027 | 0.13526                             | 0.00331 | 0.05247                             | 0.00117            | 128.8                               | 1.71 | 128.8                               | 1.86 |
| XLT01    |                 |       |                                     |         |                                     |         |                                     |                    |                                     |      |                                     |      |
|          | XLT01-1         | 0.46  | 0.01962                             | 0.00025 | 0.13283                             | 0.00259 | 0.05163                             | 0.0009             | 125.3                               | 1.61 | 126.6                               | 2.32 |
|          | XLT01-2         | 0.71  | 0.01969                             | 0.00025 | 0.13042                             | 0.00205 | 0.05146                             | 0.0007             | 125.7                               | 1.59 | 124.5                               | 1.84 |
|          | XLT01-3         | 0.50  | 0.01958                             | 0.00025 | 0.12762                             | 0.0021  | 0.0485                              | 0.0007             | 125                                 | 1.59 | 122                                 | 1.89 |
|          | XLT01-4         | 0.58  | 0.01959                             | 0.00025 | 0.1385                              | 0.00197 | 0.05254                             | 0.00063            | 125                                 | 1.58 | 131.7                               | 1.76 |
|          | XLT01-5         | 0.54  | 0.01973                             | 0.00025 | 0.12647                             | 0.00187 | 0.04725                             | 0.0006             | 126                                 | 1.59 | 120.9                               | 1.69 |
|          | XLT01-6         | 0.45  | 0.02002                             | 0.00026 | 0.13353                             | 0.00242 | 0.05323                             | 0.00085            | 127.8                               | 1.63 | 127.3                               | 2.17 |
|          | XLT01-7         | 0.54  | 0.01958                             | 0.00025 | 0.13046                             | 0.00217 | 0.04992                             | 0.00072            | 125                                 | 1.59 | 124.5                               | 1.95 |
|          | XLT01-8         | 0.48  | 0.01944                             | 0.00025 | 0.12376                             | 0.002   | 0.04747                             | 0.00067            | 124.1                               | 1.58 | 118.5                               | 1.81 |
|          | XLT01-9         | 0.56  | 0.02864                             | 0.00037 | 0.94454                             | 0.01261 | 0.22889                             | 0.00243            | 182                                 | 2.29 | 675.3                               | 6.58 |
|          | XLT01-10        | 0.58  | 0.01962                             | 0.00025 | 0.13304                             | 0.0021  | 0.04972                             | 0.00068            | 125.2                               | 1.59 | 126.8                               | 1.88 |
|          | XLT01-11        | 0.50  | 0.01919                             | 0.00025 | 0.12661                             | 0.00208 | 0.04864                             | 0.00069            | 122.5                               | 1.56 | 121                                 | 1.87 |
|          | XLT01-12        | 0.49  | 0.01962                             | 0.00025 | 0.13278                             | 0.00209 | 0.05054                             | 0.00069            | 125.3                               | 1.59 | 126.6                               | 1.87 |
|          | XLT01-13        | 0.53  | 0.01961                             | 0.00025 | 0.13148                             | 0.00204 | 0.04843                             | 0.00065            | 125.2                               | 1.59 | 125.4                               | 1.83 |
|          | XLT01-14        | 0.45  | 0.01971                             | 0.00025 | 0.13196                             | 0.00227 | 0.04924                             | 0.00074            | 125.8                               | 1.6  | 125.9                               | 2.04 |
|          | XLT01-15        | 0.44  | 0.01967                             | 0.00025 | 0.13275                             | 0.00246 | 0.05016                             | 0.00082            | 125.6                               | 1.61 | 126.6                               | 2.2  |
|          | XLT01-16        | 0.50  | 0.01897                             | 0.00024 | 0.13402                             | 0.00222 | 0.05399                             | 0.00078            | 121.1                               | 1.54 | 127.7                               | 1.99 |
|          | XLT01-17        | 0.52  | 0.02061                             | 0.00026 | 0.13775                             | 0.00223 | 0.05228                             | 0.00073            | 131.5                               | 1.67 | 131                                 | 1.99 |
|          | XLT01-18        | 0.37  | 0.01957                             | 0.00025 | 0.13025                             | 0.00232 | 0.05269                             | 0.00083            | 124.9                               | 1.59 | 124.3                               | 2.08 |

| Analysis | Isotopic ratios |      |                                     |         |                                     |         |                                     |         | Apparent ages (Ma)                  |      |                                     |      |
|----------|-----------------|------|-------------------------------------|---------|-------------------------------------|---------|-------------------------------------|---------|-------------------------------------|------|-------------------------------------|------|
|          | Spot            | Th/U | <sup>206</sup> Pb/ <sup>238</sup> U | 1σ      | <sup>207</sup> Pb/ <sup>235</sup> U | 1σ      | <sup>207</sup> Pb/ <sup>206</sup> U | 1σ      | <sup>206</sup> Pb/ <sup>238</sup> U | 1σ   | <sup>207</sup> Pb/ <sup>235</sup> U | 1σ   |
|          | XLT01-19        | 0.35 | 0.01961                             | 0.00025 | 0.13285                             | 0.00253 | 0.05135                             | 0.00087 | 125.2                               | 1.6  | 126.7                               | 2.26 |
|          | XLT01-20        | 0.48 | 0.01973                             | 0.00025 | 0.13188                             | 0.00207 | 0.05014                             | 0.00068 | 126                                 | 1.6  | 125.8                               | 1.86 |
|          | XLT01-21        | 0.58 | 0.01901                             | 0.00024 | 0.13668                             | 0.00223 | 0.05215                             | 0.00073 | 121.4                               | 1.54 | 130.1                               | 1.99 |
|          | XLT01-22        | 0.57 | 0.01964                             | 0.00025 | 0.13071                             | 0.00217 | 0.0524                              | 0.00076 | 125.4                               | 1.6  | 124.7                               | 1.95 |
| SQT01    |                 |      |                                     |         |                                     |         |                                     |         |                                     |      |                                     |      |
|          | SQT01-1         | 0.66 | 0.02006                             | 0.00026 | 0.13554                             | 0.00275 | 0.04918                             | 0.00088 | 128.1                               | 1.65 | 129.1                               | 2.46 |
|          | SQT01-2         | 1.07 | 0.01919                             | 0.00025 | 0.12912                             | 0.00273 | 0.04874                             | 0.00092 | 122.5                               | 1.58 | 123.3                               | 2.45 |
|          | SQT01-3         | 0.72 | 0.01882                             | 0.00024 | 0.12831                             | 0.0027  | 0.04885                             | 0.00092 | 120.2                               | 1.54 | 122.6                               | 2.43 |
|          | SQT01-4         | 0.59 | 0.0218                              | 0.00031 | 0.14959                             | 0.00656 | 0.04947                             | 0.00203 | 139                                 | 1.97 | 141.6                               | 5.8  |
|          | SQT01-5         | 0.67 | 0.01853                             | 0.00025 | 0.12324                             | 0.00427 | 0.04497                             | 0.00146 | 118.4                               | 1.59 | 118                                 | 3.86 |
|          | SQT01-6         | 0.58 | 0.02094                             | 0.00027 | 0.14092                             | 0.00391 | 0.0469                              | 0.0012  | 133.6                               | 1.73 | 133.9                               | 3.48 |
|          | SQT01-7         | 0.80 | 0.02136                             | 0.00028 | 0.14513                             | 0.00429 | 0.04719                             | 0.00129 | 136.3                               | 1.79 | 137.6                               | 3.8  |
|          | SQT01-8         | 0.56 | 0.01988                             | 0.00026 | 0.13289                             | 0.00349 | 0.05048                             | 0.00122 | 126.9                               | 1.65 | 126.7                               | 3.13 |
|          | SQT01-9         | 0.87 | 0.01901                             | 0.00025 | 0.12734                             | 0.00297 | 0.04249                             | 0.00089 | 121.4                               | 1.56 | 121.7                               | 2.68 |
|          | SQT01-10        | 0.79 | 0.02023                             | 0.00026 | 0.13761                             | 0.00303 | 0.05098                             | 0.001   | 129.1                               | 1.65 | 130.9                               | 2.7  |
|          | SQT01-11        | 0.68 | 0.0192                              | 0.00024 | 0.12771                             | 0.00229 | 0.04519                             | 0.0007  | 122.6                               | 1.54 | 122                                 | 2.07 |
|          | SQT01-12        | 0.68 | 0.01857                             | 0.00025 | 0.12928                             | 0.00338 | 0.04942                             | 0.00118 | 118.6                               | 1.55 | 123.4                               | 3.04 |
|          | SQT01-13        | 0.57 | 0.02172                             | 0.0003  | 0.14595                             | 0.00627 | 0.04674                             | 0.00189 | 138.5                               | 1.91 | 138.3                               | 5.55 |
|          | SQT01-14        | 0.59 | 0.01943                             | 0.00027 | 0.13027                             | 0.00607 | 0.03647                             | 0.00162 | 124.1                               | 1.68 | 124.3                               | 5.45 |
|          | SQT01-15        | 0.86 | 0.01959                             | 0.00025 | 0.13306                             | 0.00261 | 0.05043                             | 0.00087 | 125.1                               | 1.58 | 126.8                               | 2.34 |
|          | SQT01-16        | 0.56 | 0.01784                             | 0.00023 | 0.12695                             | 0.00284 | 0.04488                             | 0.0009  | 114                                 | 1.45 | 121.4                               | 2.55 |
|          | SQT01-17        | 0.73 | 0.01913                             | 0.00024 | 0.12863                             | 0.00219 | 0.04525                             | 0.00066 | 122.2                               | 1.52 | 122.9                               | 1.97 |
|          | SQT01-18        | 0.60 | 0.02009                             | 0.00026 | 0.13436                             | 0.00306 | 0.04972                             | 0.00101 | 128.2                               | 1.63 | 128                                 | 2.74 |

| Analysis |      | Isotopic ratios |                                  |            |                                  |            |                                  | Apparent ages (Ma) |                                  |            |                                  |
|----------|------|-----------------|----------------------------------|------------|----------------------------------|------------|----------------------------------|--------------------|----------------------------------|------------|----------------------------------|
|          |      | Th/U            | $^{206}\text{Pb}/^{238}\text{U}$ | 1 $\sigma$ | $^{207}\text{Pb}/^{235}\text{U}$ | 1 $\sigma$ | $^{207}\text{Pb}/^{206}\text{U}$ | 1 $\sigma$         | $^{206}\text{Pb}/^{238}\text{U}$ | 1 $\sigma$ | $^{207}\text{Pb}/^{235}\text{U}$ |
| Spot     |      |                 |                                  |            |                                  |            |                                  |                    |                                  |            |                                  |
| SQT01-19 | 0.59 | 0.02014         | 0.00025                          | 0.13474    | 0.00261                          | 0.04818    | 0.00082                          | 128.5              | 1.61                             | 128.3      | 2.33                             |
| SQT01-20 | 0.56 | 0.01886         | 0.00025                          | 0.12938    | 0.00366                          | 0.04607    | 0.0012                           | 120.5              | 1.56                             | 123.5      | 3.29                             |
| SQT01-21 | 0.55 | 0.01985         | 0.00026                          | 0.13217    | 0.00417                          | 0.0481     | 0.00141                          | 126.7              | 1.67                             | 126        | 3.74                             |
| SQT01-22 | 0.73 | 0.01932         | 0.00026                          | 0.20396    | 0.00553                          | 0.08159    | 0.00197                          | 123.3              | 1.65                             | 188.5      | 4.66                             |
| SQT01-23 | 0.52 | 0.01884         | 0.00024                          | 0.12609    | 0.00235                          | 0.04189    | 0.00068                          | 120.4              | 1.49                             | 120.6      | 2.12                             |
| SQT01-24 | 0.78 | 0.01932         | 0.00027                          | 0.12945    | 0.00482                          | 0.04634    | 0.0016                           | 123.4              | 1.68                             | 123.6      | 4.33                             |
| SQT01-25 | 0.55 | 0.01798         | 0.00024                          | 0.11983    | 0.00358                          | 0.05138    | 0.00143                          | 114.8              | 1.51                             | 114.9      | 3.25                             |
| SQT01-26 | 0.63 | 0.01935         | 0.00024                          | 0.12902    | 0.00254                          | 0.04507    | 0.00079                          | 123.5              | 1.53                             | 123.2      | 2.29                             |
| SQT01-27 | 0.68 | 0.01857         | 0.00025                          | 0.12333    | 0.00389                          | 0.04768    | 0.0014                           | 118.6              | 1.55                             | 118.1      | 3.51                             |

**Table S2** Major (wt%) and trace elements (ppm) results of the intrusive samples from Ulanhot area.

| Sample                             | DBD01 | DBD02 | DBDD03 | DBD04 | DBD06 | DBD07 | DBD08 | DBD09 | XLD03 | XLD04 | SQD11 | SQD12 | SQD13 | SQD14 |
|------------------------------------|-------|-------|--------|-------|-------|-------|-------|-------|-------|-------|-------|-------|-------|-------|
| SiO <sub>2</sub>                   | 65.65 | 66.15 | 66.32  | 66.95 | 59.27 | 59.69 | 59.01 | 59.83 | 75.96 | 75.26 | 71.22 | 72.03 | 71.98 | 69.44 |
| Al <sub>2</sub> O <sub>3</sub>     | 15.50 | 15.95 | 15.57  | 15.45 | 17.50 | 17.14 | 18.67 | 17.66 | 11.99 | 12.42 | 14.99 | 14.27 | 14.43 | 16.00 |
| TiO <sub>2</sub>                   | 0.47  | 0.45  | 0.46   | 0.45  | 0.88  | 0.84  | 0.93  | 0.88  | 0.28  | 0.30  | 0.35  | 0.25  | 0.25  | 0.33  |
| Fe <sub>2</sub> O <sub>3</sub>     | 2.18  | 2.07  | 2.41   | 2.53  | 4.12  | 3.72  | 4.53  | 4.13  | 0.85  | 1.36  | 1.65  | 1.82  | 1.61  | 1.42  |
| FeO                                | 1.66  | 1.52  | 1.30   | 1.14  | 0.70  | 1.25  | 0.87  | 0.93  | 0.94  | 0.55  | 0.50  | 0.37  | 0.39  | 0.66  |
| CaO                                | 2.75  | 2.82  | 2.39   | 2.49  | 3.64  | 4.49  | 3.10  | 3.04  | 0.66  | 0.97  | 1.33  | 0.51  | 0.60  | 1.66  |
| MgO                                | 1.17  | 1.11  | 1.13   | 1.06  | 1.18  | 1.43  | 1.09  | 0.98  | 0.45  | 0.43  | 0.47  | 0.30  | 0.30  | 0.50  |
| K <sub>2</sub> O                   | 3.56  | 3.47  | 3.69   | 3.52  | 3.48  | 3.08  | 3.33  | 3.59  | 3.81  | 3.27  | 3.29  | 5.79  | 5.38  | 4.16  |
| Na <sub>2</sub> O                  | 4.57  | 4.42  | 4.48   | 4.34  | 4.53  | 4.03  | 5.79  | 4.73  | 3.79  | 4.21  | 4.97  | 3.73  | 4.17  | 4.62  |
| MnO                                | 0.073 | 0.065 | 0.070  | 0.069 | 0.075 | 0.075 | 0.070 | 0.066 | 0.053 | 0.048 | 0.047 | 0.043 | 0.019 | 0.050 |
| P <sub>2</sub> O <sub>5</sub>      | 0.143 | 0.134 | 0.140  | 0.137 | 0.303 | 0.292 | 0.324 | 0.297 | 0.092 | 0.100 | 0.138 | 0.054 | 0.058 | 0.116 |
| LOI                                | 1.84  | 1.46  | 1.65   | 1.53  | 3.95  | 3.53  | 1.87  | 3.48  | 0.84  | 0.84  | 0.77  | 0.58  | 0.58  | 0.75  |
| Total                              | 99.77 | 99.79 | 99.77  | 99.79 | 99.71 | 99.71 | 99.68 | 99.72 | 99.83 | 99.82 | 99.79 | 99.80 | 99.81 | 99.79 |
| K <sub>2</sub> O+Na <sub>2</sub> O | 8.13  | 7.89  | 8.17   | 7.85  | 8.01  | 7.11  | 9.12  | 8.32  | 7.61  | 7.48  | 8.26  | 9.52  | 9.55  | 8.78  |
| FeO <sup>T</sup> /MgO              | 3.09  | 3.04  | 3.09   | 3.23  | 3.73  | 3.21  | 4.55  | 4.72  | 3.83  | 4.10  | 4.24  | 6.71  | 6.04  | 3.85  |
| Mg <sup>#</sup>                    | 36.84 | 37.20 | 36.84  | 35.78 | 32.56 | 35.89 | 28.36 | 27.61 | 31.96 | 30.50 | 29.82 | 21.16 | 22.95 | 31.87 |
| σ                                  | 2.92  | 2.69  | 2.86   | 2.57  | 3.94  | 3.03  | 5.19  | 4.11  | 1.76  | 1.73  | 2.42  | 3.12  | 3.15  | 2.92  |
| A/CNK                              | 0.95  | 0.99  | 0.99   | 1.00  | 0.98  | 0.95  | 0.99  | 1.03  | 1.03  | 1.02  | 1.06  | 1.07  | 1.05  | 1.06  |
| A/NK                               | 1.36  | 1.44  | 1.37   | 1.41  | 1.56  | 1.72  | 1.42  | 1.51  | 1.16  | 1.19  | 1.28  | 1.15  | 1.14  | 1.32  |
| Y                                  | 15.9  | 14.1  | 14.8   | 15.7  | 14.4  | 14.8  | 16.1  | 15.3  | 10.2  | 10.6  | 12.1  | 21.2  | 22.0  | 12.5  |
| La                                 | 25.1  | 26.0  | 24.6   | 25.0  | 22.9  | 23.0  | 23.2  | 23.4  | 17.9  | 20.2  | 24.1  | 28.7  | 32.1  | 22.1  |
| Ce                                 | 53.3  | 55.5  | 55.1   | 52.0  | 50.3  | 51.7  | 52.1  | 50.7  | 36.3  | 42.4  | 49.4  | 53.3  | 65.5  | 45.7  |
| Pr                                 | 5.67  | 5.88  | 5.57   | 5.55  | 5.95  | 5.93  | 6.08  | 5.92  | 3.98  | 4.55  | 5.52  | 6.43  | 7.14  | 5.14  |
| Nd                                 | 21.1  | 21.9  | 20.5   | 20.6  | 23.7  | 23.6  | 24.1  | 23.8  | 14.2  | 16.7  | 20.7  | 23.6  | 25.9  | 19.3  |

| Sample | DBD01 | DBD02 | DBDD03 | DBD04 | DBD06 | DBD07 | DBD08 | DBD09 | XLD03 | XLD04 | SQD11 | SQD12 | SQD13 | SQD14 |
|--------|-------|-------|--------|-------|-------|-------|-------|-------|-------|-------|-------|-------|-------|-------|
| Sm     | 4.20  | 4.51  | 4.11   | 4.12  | 4.89  | 4.95  | 5.10  | 4.91  | 2.58  | 3.11  | 3.98  | 4.63  | 5.00  | 3.89  |
| Eu     | 1.05  | 1.22  | 1.06   | 1.06  | 1.46  | 1.61  | 1.61  | 1.56  | 0.73  | 0.86  | 0.94  | 0.85  | 0.85  | 0.98  |
| Gd     | 3.59  | 3.85  | 3.38   | 3.50  | 3.91  | 4.07  | 3.96  | 4.06  | 2.14  | 2.43  | 2.91  | 3.99  | 4.23  | 3.09  |
| Tb     | 0.53  | 0.55  | 0.51   | 0.52  | 0.57  | 0.60  | 0.58  | 0.59  | 0.30  | 0.35  | 0.42  | 0.64  | 0.65  | 0.43  |
| Dy     | 2.78  | 2.84  | 2.66   | 2.68  | 2.75  | 3.07  | 2.89  | 2.83  | 1.45  | 1.70  | 2.02  | 3.41  | 3.41  | 2.09  |
| Ho     | 0.57  | 0.60  | 0.57   | 0.57  | 0.56  | 0.59  | 0.59  | 0.59  | 0.29  | 0.34  | 0.39  | 0.70  | 0.72  | 0.38  |
| Er     | 1.65  | 1.69  | 1.59   | 1.58  | 1.54  | 1.66  | 1.62  | 1.58  | 0.87  | 0.98  | 1.08  | 2.06  | 2.17  | 1.10  |
| Tm     | 0.27  | 0.29  | 0.26   | 0.29  | 0.23  | 0.26  | 0.27  | 0.25  | 0.14  | 0.17  | 0.18  | 0.36  | 0.36  | 0.16  |
| Yb     | 1.75  | 1.83  | 1.71   | 1.73  | 1.53  | 1.68  | 1.67  | 1.61  | 0.96  | 1.16  | 1.19  | 2.36  | 2.35  | 1.08  |
| Lu     | 0.29  | 0.29  | 0.28   | 0.29  | 0.25  | 0.27  | 0.27  | 0.24  | 0.16  | 0.18  | 0.17  | 0.37  | 0.37  | 0.17  |
| Li     | 28.4  | 31.5  | 29.3   | 22.0  | 31.3  | 51.7  | 22.2  | 24.4  | 13.8  | 11.2  | 13.0  | 6.6   | 7.99  | 10.2  |
| Be     | 2.28  | 2.34  | 2.17   | 2.30  | 2.21  | 2.22  | 1.91  | 2.40  | 2.85  | 2.88  | 2.87  | 3.04  | 3.49  | 3.30  |
| Sc     | 6.59  | 6.89  | 7.41   | 11.0  | 10.0  | 10.4  | 9.79  | 10.1  | 3.04  | 2.83  | 3.72  | 5.35  | 2.53  | 3.07  |
| V      | 51.3  | 49.4  | 46.9   | 47.0  | 124   | 122   | 112   | 120   | 4.80  | 6.31  | 23.2  | 12.0  | 14.1  | 27.0  |
| Cr     | 8.23  | 7.24  | 7.36   | 9.23  | 6.55  | 6.21  | 6.70  | 7.29  | 9.94  | 6.69  | 7.95  | 7.09  | 8.99  | 8.24  |
| Co     | 7.06  | 6.53  | 6.53   | 6.79  | 9.84  | 10.9  | 9.88  | 8.89  | 1.59  | 1.70  | 2.27  | 1.59  | 1.66  | 2.33  |
| Ni     | 4.90  | 2.74  | 3.12   | 3.41  | 3.92  | 8.09  | 3.89  | 2.61  | 1.35  | 2.44  | 2.44  | 3.04  | 2.40  | 1.93  |
| Cu     | 7.13  | 7.54  | 9.10   | 7.85  | 9.19  | 7.89  | 7.74  | 7.97  | 3.29  | 2.98  | 5.43  | 2.63  | 14.4  | 3.62  |
| Zn     | 61.8  | 59.0  | 58.2   | 62.5  | 94.4  | 90.8  | 99.9  | 77.1  | 61.3  | 56.4  | 37.5  | 29.9  | 22.1  | 51.8  |
| Ga     | 19.0  | 19.7  | 18.8   | 19.2  | 21.7  | 21.8  | 22.3  | 22.5  | 13.9  | 16.2  | 21.4  | 17.3  | 17.1  | 23.6  |
| Rb     | 103   | 92.1  | 103    | 98.2  | 74.8  | 64.8  | 77.1  | 90.6  | 107   | 85.7  | 103   | 174   | 177   | 152   |
| Sr     | 574   | 435   | 511    | 401   | 746   | 813   | 802   | 862   | 278   | 321   | 645   | 242   | 237   | 595   |
| Zr     | 104   | 84.1  | 119    | 106   | 185   | 186   | 204   | 194   | 183   | 202   | 67.1  | 198   | 206   | 67.8  |
| Nb     | 8.04  | 7.79  | 7.95   | 8.21  | 6.33  | 6.22  | 6.76  | 6.52  | 5.32  | 6.04  | 9.53  | 11.0  | 11.3  | 9.78  |

| Sample               | DBD01  | DBD02  | DBDD03 | DBD04  | DBD06  | DBD07  | DBD08  | DBD09  | XLD03  | XLD04  | SQD11  | SQD12  | SQD13  | SQD14  |
|----------------------|--------|--------|--------|--------|--------|--------|--------|--------|--------|--------|--------|--------|--------|--------|
| Mo                   | 0.33   | 0.65   | 0.69   | 0.54   | 0.42   | 0.60   | 0.32   | 0.48   | 0.073  | 0.057  | 0.076  | 0.25   | 0.19   | 0.97   |
| Cd                   | 0.063  | 0.072  | 0.065  | 0.063  | 0.069  | 0.075  | 0.055  | 0.056  | 0.046  | 0.054  | 0.058  | 0.022  | 0.046  | 0.068  |
| In                   | 0.040  | 0.039  | 0.043  | 0.040  | 0.056  | 0.052  | 0.059  | 0.055  | 0.027  | 0.021  | 0.031  | 0.031  | 0.017  | 0.052  |
| Cs                   | 3.40   | 2.48   | 4.02   | 3.40   | 8.50   | 6.29   | 4.35   | 8.67   | 3.02   | 2.86   | 2.72   | 3.57   | 2.97   | 3.59   |
| Ba                   | 1032   | 982    | 1060   | 1077   | 1305   | 1331   | 1402   | 1145   | 865    | 981    | 883    | 1152   | 1080   | 994    |
| Hf                   | 3.71   | 3.47   | 3.92   | 3.67   | 5.44   | 5.52   | 5.55   | 5.34   | 4.65   | 5.29   | 2.44   | 6.03   | 6.58   | 2.67   |
| Ta                   | 0.72   | 0.56   | 0.56   | 0.51   | 0.56   | 0.57   | 0.45   | 0.50   | 0.64   | 0.92   | 0.63   | 0.58   | 0.66   | 0.68   |
| W                    | 0.68   | 0.73   | 0.71   | 0.64   | 0.56   | 0.59   | 1.00   | 0.75   | 1.28   | 1.17   | 0.53   | 0.42   | 1.48   | 0.60   |
| Tl                   | 0.50   | 0.51   | 0.52   | 0.47   | 0.40   | 0.38   | 0.51   | 0.44   | 0.58   | 0.38   | 0.66   | 0.89   | 1.18   | 0.83   |
| Pb                   | 21.6   | 15.4   | 14.2   | 14.6   | 12.8   | 14.2   | 13.5   | 12.9   | 13.7   | 15.4   | 14.6   | 13.3   | 17.5   | 15.1   |
| Bi                   | 0.023  | 0.018  | 0.025  | 0.025  | 0.17   | 0.060  | 0.12   | 0.064  | 0.038  | 0.020  | 0.038  | 0.041  | 0.057  | 0.11   |
| Th                   | 6.32   | 6.97   | 6.61   | 7.07   | 4.69   | 4.70   | 4.61   | 4.65   | 4.98   | 5.54   | 5.16   | 10.7   | 10.4   | 7.35   |
| U                    | 1.36   | 1.42   | 1.65   | 1.67   | 1.33   | 1.33   | 1.44   | 1.40   | 1.35   | 1.85   | 1.00   | 1.98   | 2.70   | 0.93   |
| ΣREE                 | 121.88 | 126.99 | 117.99 | 119.46 | 120.45 | 123.1  | 123.99 | 122.09 | 82.02  | 95.16  | 112.93 | 131.38 | 150.75 | 105.7  |
| LREE/HREE            | 9.66   | 9.63   | 9.76   | 9.72   | 9.63   | 9.09   | 9.46   | 9.39   | 11.99  | 12.00  | 12.49  | 8.47   | 9.57   | 11.42  |
| (La/Yb) <sub>N</sub> | 10.28  | 10.18  | 10.33  | 10.40  | 10.71  | 9.84   | 9.98   | 10.42  | 13.36  | 12.53  | 14.48  | 8.72   | 9.78   | 14.63  |
| δEu                  | 0.82   | 0.89   | 0.87   | 0.85   | 1.02   | 1.10   | 1.10   | 1.07   | 0.95   | 0.96   | 0.84   | 0.61   | 0.57   | 0.86   |
| T <sub>Zr</sub>      | 751    | 739    | 766    | 759    | 795    | 797    | 802    | 803    | 813    | 821    | 728    | 817    | 819    | 727    |
| Zr+Nb+Ce+Y           | 181.31 | 161.52 | 192.51 | 182.37 | 255.57 | 258.35 | 278.79 | 266.24 | 234.74 | 260.63 | 138.11 | 283.90 | 304.63 | 135.80 |
| Ce/Pb                | 2.47   | 3.61   | 3.59   | 3.56   | 3.93   | 3.64   | 3.85   | 3.93   | 2.65   | 2.75   | 3.38   | 4.00   | 3.75   | 3.02   |
| Nb/U                 | 5.92   | 5.50   | 4.82   | 4.92   | 4.74   | 4.69   | 4.68   | 4.66   | 3.93   | 3.26   | 9.48   | 5.55   | 4.19   | 10.49  |
| Zr/Hf                | 28.09  | 24.24  | 30.26  | 29.03  | 33.92  | 33.61  | 36.75  | 36.30  | 39.33  | 38.08  | 27.56  | 32.92  | 31.30  | 25.38  |
| Nd/Th                | 3.35   | 3.15   | 3.10   | 2.91   | 5.04   | 5.03   | 5.22   | 5.12   | 2.85   | 3.01   | 4.00   | 2.22   | 2.49   | 2.63   |
| La/Nb                | 3.12   | 3.34   | 3.10   | 3.05   | 3.62   | 3.70   | 3.44   | 3.59   | 3.37   | 3.35   | 2.53   | 2.61   | 2.84   | 2.26   |



| Sample | DBD01 | DBD02 | DBDD03 | DBD04 | DBD06 | DBD07 | DBD08 | DBD09 | XLD03 | XLD04 | SQD11 | SQD12 | SQD13 | SQD14 |
|--------|-------|-------|--------|-------|-------|-------|-------|-------|-------|-------|-------|-------|-------|-------|
| Nb/Ta  | 11.23 | 13.79 | 14.25  | 16.21 | 11.29 | 10.97 | 14.88 | 13.13 | 8.36  | 6.59  | 15.01 | 18.89 | 17.25 | 14.34 |

Note: A/CNK, molar ratio of  $\text{Al}_2\text{O}_3/(\text{CaO} + \text{Na}_2\text{O} + \text{K}_2\text{O})$ ; A/NK, molar ratio of  $\text{Al}_2\text{O}_3/(\text{Na}_2\text{O} + \text{K}_2\text{O})$ ; LOI, loss on ignition;  $\text{Mg}^\# = 100 \times [(\text{MgO}/40)/(\text{MgO}/40 + 0.8998\text{FeO}^\text{T}/72)]$ ;  $\text{FeO}^\text{T} = \text{FeO} + 0.8998 \times \text{Fe}_2\text{O}_3$ ;  $\delta\text{Eu} = \text{Eu}/\text{Eu}^* = \text{Eu}_\text{N}/\text{Sqrt}(\text{Sm}_\text{N} \times \text{Gd}_\text{N})$ ;  $\text{La}_\text{N}/\text{Yb}_\text{N} = (\text{La}/0.237)/(\text{Yb}/0.17)$ ;  $\text{Tzr} = 12900/[2.95 + 0.85 \times \text{M} + \ln(496000/\text{Zr})] - 273.15$ ;  $\text{M} = [\text{n}(\text{Na}) + \text{n}(\text{K}) + 2 \times \text{n}(\text{Ca})]/[\text{n}(\text{Al}) \times \text{n}(\text{Si})]$  (Watson [136]).

**Table S3** Zircon Hf isotopic compositions of the Early Cretaceous Ulanhot intrusive rocks.

| Spot     | Ages (Ma) | $^{176}\text{Yb}/^{177}\text{Hf}$ | $^{176}\text{Lu}/^{177}\text{Hf}$ | $^{176}\text{Hf}/^{177}\text{Hf}$ | $2\sigma$ | $^{176}\text{Hf}/^{177}\text{Hf}_i$ | $\varepsilon\text{Hf}(0)$ | $\varepsilon\text{Hf}(t)$ | $T_{\text{DM1}}$ (Ma) | $T_{\text{DM2}}$ (Ma) | $f_{\text{Lu/Hf}}$ |
|----------|-----------|-----------------------------------|-----------------------------------|-----------------------------------|-----------|-------------------------------------|---------------------------|---------------------------|-----------------------|-----------------------|--------------------|
| DBT01-01 | 127       | 0.035383                          | 0.001287                          | 0.282920                          | 0.000018  | 0.282917                            | 5.22                      | 7.92                      | 475                   | 679                   | -0.96              |
| DBT01-02 | 127       | 0.051181                          | 0.001830                          | 0.282918                          | 0.000017  | 0.282913                            | 5.15                      | 7.78                      | 484                   | 685                   | -0.94              |
| DBT01-03 | 127       | 0.043111                          | 0.001531                          | 0.282937                          | 0.000017  | 0.282933                            | 5.82                      | 8.48                      | 453                   | 641                   | -0.95              |
| DBT01-04 | 127       | 0.061152                          | 0.002168                          | 0.282903                          | 0.000025  | 0.282898                            | 4.62                      | 7.25                      | 511                   | 722                   | -0.93              |
| DBT01-05 | 127       | 0.040038                          | 0.001469                          | 0.282911                          | 0.000015  | 0.282908                            | 4.92                      | 7.6                       | 489                   | 698                   | -0.96              |
| DBT02-01 | 128       | 0.037573                          | 0.001204                          | 0.282923                          | 0.000014  | 0.28292                             | 5.34                      | 8.05                      | 469                   | 670                   | -0.96              |
| DBT02-02 | 128       | 0.086665                          | 0.003090                          | 0.282977                          | 0.000018  | 0.28297                             | 7.26                      | 9.81                      | 412                   | 557                   | -0.91              |
| DBT02-03 | 128       | 0.044863                          | 0.001642                          | 0.282938                          | 0.000015  | 0.282934                            | 5.86                      | 8.54                      | 453                   | 639                   | -0.95              |
| DBT02-04 | 128       | 0.053233                          | 0.002018                          | 0.282943                          | 0.000017  | 0.282938                            | 6.04                      | 8.68                      | 450                   | 629                   | -0.94              |
| DBT02-05 | 128       | 0.043762                          | 0.001767                          | 0.282982                          | 0.000022  | 0.282978                            | 7.43                      | 10.10                     | 390                   | 538                   | -0.95              |
| XLT01-01 | 124       | 0.058346                          | 0.001752                          | 0.282977                          | 0.000017  | 0.282973                            | 7.26                      | 9.83                      | 397                   | 552                   | -0.95              |
| XLT01-02 | 124       | 0.057268                          | 0.001725                          | 0.283020                          | 0.000016  | 0.283016                            | 8.79                      | 11.35                     | 334                   | 453                   | -0.95              |
| XLT01-03 | 124       | 0.074166                          | 0.002213                          | 0.283161                          | 0.000021  | 0.283156                            | 13.75                     | 16.31                     | 132                   | 136                   | -0.93              |
| XLT01-04 | 124       | 0.050377                          | 0.001528                          | 0.282994                          | 0.000016  | 0.282991                            | 7.85                      | 10.47                     | 371                   | 513                   | -0.95              |
| XLT01-05 | 124       | 0.059458                          | 0.001801                          | 0.282977                          | 0.000016  | 0.282973                            | 7.27                      | 9.83                      | 397                   | 551                   | -0.95              |
| SQT01-01 | 124       | 0.049845                          | 0.001726                          | 0.282968                          | 0.000016  | 0.282964                            | 6.92                      | 9.51                      | 411                   | 574                   | -0.95              |
| SQT01-02 | 124       | 0.023884                          | 0.000856                          | 0.282925                          | 0.000016  | 0.282923                            | 5.42                      | 8.06                      | 461                   | 665                   | -0.97              |
| SQT01-03 | 124       | 0.034198                          | 0.001252                          | 0.282912                          | 0.000018  | 0.282909                            | 4.95                      | 7.57                      | 485                   | 697                   | -0.96              |
| SQT01-04 | 124       | 0.047549                          | 0.001662                          | 0.282929                          | 0.000017  | 0.282925                            | 5.54                      | 8.13                      | 467                   | 663                   | -0.95              |
| SQT01-05 | 124       | 0.026088                          | 0.000942                          | 0.282925                          | 0.000015  | 0.282923                            | 5.41                      | 8.06                      | 463                   | 667                   | -0.97              |

**Table S4** Geochronological data of the Late Mesozoic intrusive rocks in the central-southern Great Xing'an Range.

| Sample number | Pluton/District name | Lithology                       | Method           | Age (Ma)    | Reference             |
|---------------|----------------------|---------------------------------|------------------|-------------|-----------------------|
| DBT01         | Dongbaolidagan       | Quartz-monzonite-porphyry       | Zircon LA-ICP-MS | 127.47±0.36 | This paper            |
| DBT02         | Dongbaolidagan       | Monzonite porphyry              | Zircon LA-ICP-MS | 128.07±0.62 | This paper            |
| XLT01         | Xielin               | Quartz porphyry                 | Zircon LA-ICP-MS | 124.85±0.34 | This paper            |
| SQT01         | Shuiquan             | Granite porphyry                | Zircon LA-ICP-MS | 124.15±0.31 | This paper            |
| G02011-4      | Dashizhai            | Biotite granite                 | Zircon LA-ICP-MS | 182±3       | Ge et al. [1]         |
| G02013-4      | Jingyang             | Biotite granodiorite            | Zircon LA-ICP-MS | 174±4       | Ge et al. [1]         |
| G0208-1       | Qingshan             | gneissoid-biotitic granodiorite | Zircon LA-ICP-MS | 136±3       | Ge et al. [1]         |
| G0208-3       |                      | Biotite granodiorite            | Zircon LA-ICP-MS | 134±2       | Ge et al. [1]         |
| G0205-4       | Suolunzhen           | Biotite alkali feldspar granite | Zircon LA-ICP-MS | 125±2       | Ge et al. [1]         |
| G0206-1       | Yonghetun            | Monodiorite porphyry            | Zircon LA-ICP-MS | 127±2       | Ge et al. [1]         |
| G0206-2       |                      | Granite porphyry                | Zircon LA-ICP-MS | 128±3       | Ge et al. [1]         |
| Z10-16        | Wuchagou             | Alkali-feldspar granite         | Zircon LA-ICP-MS | 136.97±0.99 | Shi et al. [156]      |
| Z10-17        |                      | Biotite syenogranite            | Zircon LA-ICP-MS | 135.85±0.78 | Shi et al. [156]      |
| Z11-62        |                      | Biotite monzogranite            | Zircon LA-ICP-MS | 126.04±0.48 | Shi et al. [156]      |
| YL1           | Yili                 | Granite porphyry                | SHRIMP II        | 128.10±1.6  | Wu et al. [32]        |
| YL3           | Yili                 | Granite porphyry                | SHRIMP II        | 129.00±3.5  | Wu et al. [32]        |
| BJ-58         | Bianjiadayuan        | Quartz porphyry                 | Zircon LA-ICP-MS | 140.00±1.2  | Wang et al. [109]     |
| Z11-63        |                      | Granite porphyry                | Zircon LA-ICP-MS | 135.87±0.49 | Shi et al. [156]      |
|               | Naoniushan           | granodiorite-porphyry           | Zircon LA-ICP-MS | 141.2±0.7   | Gu et al. [82]        |
| TW03-1        | Duerji               | Monzonite granite               | Zircon LA-ICP-MS | 131.3±0.3   | Chen and Zhang. [106] |
| TW06-2        | Duerji               | Syenogranite                    | Zircon LA-ICP-MS | 130.5±0.5   | Chen and Zhang. [106] |
| D7075RZ       | Baiyinwenduer        | Alkali-feldspar granite         | Zircon LA-ICP-MS | 166±1       | Song et al. [107]     |
| LDK-01-a      | Laodaokou            | Diorite                         | SIMS zircon U-Pb | 126.09±0.95 | Liu et al. [155]      |

| WS-1          | Wushitun             | Quartz diorite              | Zircon LA-ICP-MS | 155±1       | Liu et al. [16]  |
|---------------|----------------------|-----------------------------|------------------|-------------|------------------|
| XH-1          | Xihuerle             | Granite porphyries          | Zircon LA-ICP-MS | 155±2       | Liu et al. [16]  |
| Sample number | Pluton/District name | Lithology                   | Method           | Age (Ma)    | Reference        |
| XL-1          | Xilongtun            | Quartz-monzodiorite         | Zircon LA-ICP-MS | 144±1       | Liu et al. [16]  |
| HP-1          | Hepingtun            | Syenogranite                | Zircon LA-ICP-MS | 132±1       | Liu et al. [16]  |
| WB-1          | Wubulin              | Granite porphyry            | Zircon LA-ICP-MS | 131±1       | Liu et al. [16]  |
| WB-2          | Wubulin              | Granite porphyry            | Zircon LA-ICP-MS | 130±1       | Liu et al. [16]  |
| BG-1          | Bagecangxin          | Biotite granite             | Zircon LA-ICP-MS | 126±1       | Liu et al. [16]  |
| P9-48-1       | Taipingshan          | Biotite monzogranite        | Zircon LA-ICP-MS | 127.4±1.6   | Lu et al. [64]   |
| P15-10-2      |                      | Biotite monzogranite        | Zircon LA-ICP-MS | 125.6±1.1   | Lu et al. [64]   |
| 15TQ37-2      | Duerji               | Syenogranite                | Zircon LA-ICP-MS | 148.2±1.0   | Gao et al. [105] |
| 15TQ31-2      | Majiatusun           | Granite porphyry            | Zircon LA-ICP-MS | 124.6±1.1   | Gao et al. [105] |
| GS1201        | Tuoliela             | Syenogranite                | Zircon LA-ICP-MS | 142.1±0.7   | Li et al. [5]    |
| GS3460        | Wuertu               | Syenogranite                | Zircon LA-ICP-MS | 141.7±1.0   | Li et al. [5]    |
| MP12-5        | Mingshuihe           | Alkali-feldspar granite     | Zircon LA-ICP-MS | 136±1       | Wang et al. [83] |
| MP15-9        | Suolun Racecourse    | Granosyenite                | Zircon LA-ICP-MS | 134±1       | Wang et al. [83] |
| MP22-6        | Suolun Town          | Granosyenite                | Zircon LA-ICP-MS | 128±1       | Wang et al. [83] |
| G012-1        | Dongfu               | Monzonite                   | Zircon LA-ICP-MS | 161.8±1.1   | Du et al. [143]  |
| D0044B1       | Ulanhot              | Granite porphyry            | Zircon LA-ICP-MS | 124.99±0.99 | Li et al. [78]   |
|               | Xiaokelehe           | Monzonite porphyry          | Zircon LA-ICP-MS | 139.9±4.3   | Feng et al. [26] |
| TW22          | Mandu                | Monzonitic granite          | Zircon LA-ICP-MS | 141.2±1.6   | Li. [19]         |
| TW37          | Mandu                | Monzonitic granite          | Zircon LA-ICP-MS | 134.0±1.9   | Li. [19]         |
| HLHB-1        | Haliheiba            | Biotite granite             | Zircon LA-ICP-MS | 139.1±0.7   | Wei et al. [18]  |
| HLHB-2        | Haliheiba            | Biotite granite             | Zircon LA-ICP-MS | 139.6±0.9   | Wei et al. [18]  |
| HLHB-3        | Haliheiba            | Porphyritic biotite granite | Zircon LA-ICP-MS | 138.4±1.0   | Wei et al. [18]  |

|       |            |                          |                  |       |                 |
|-------|------------|--------------------------|------------------|-------|-----------------|
| BD1-1 | Weilasituo | Granite                  | Zircon LA-ICP-MS | 140±2 | Wu et al. [108] |
| ZK44  | Weilasituo | Alkalic feldspar granite | Zircon LA-ICP-MS | 138±1 | Wu et al. [108] |
| ZK46  | Weilasituo | Alkalic feldspar granite | Zircon LA-ICP-MS | 137±1 | Wu et al. [108] |
